# Supplementary material for: Accelerating the discovery of rare tree species in Amazonian forests: integrating long monitoring tree plot data with metabolomics and phylogenetics for the description of a new species in the hyperdiverse genus Inga Mill
Source: PeerJ journal article supplement (doi:10.7717/peerj.13767), 2022-08-29

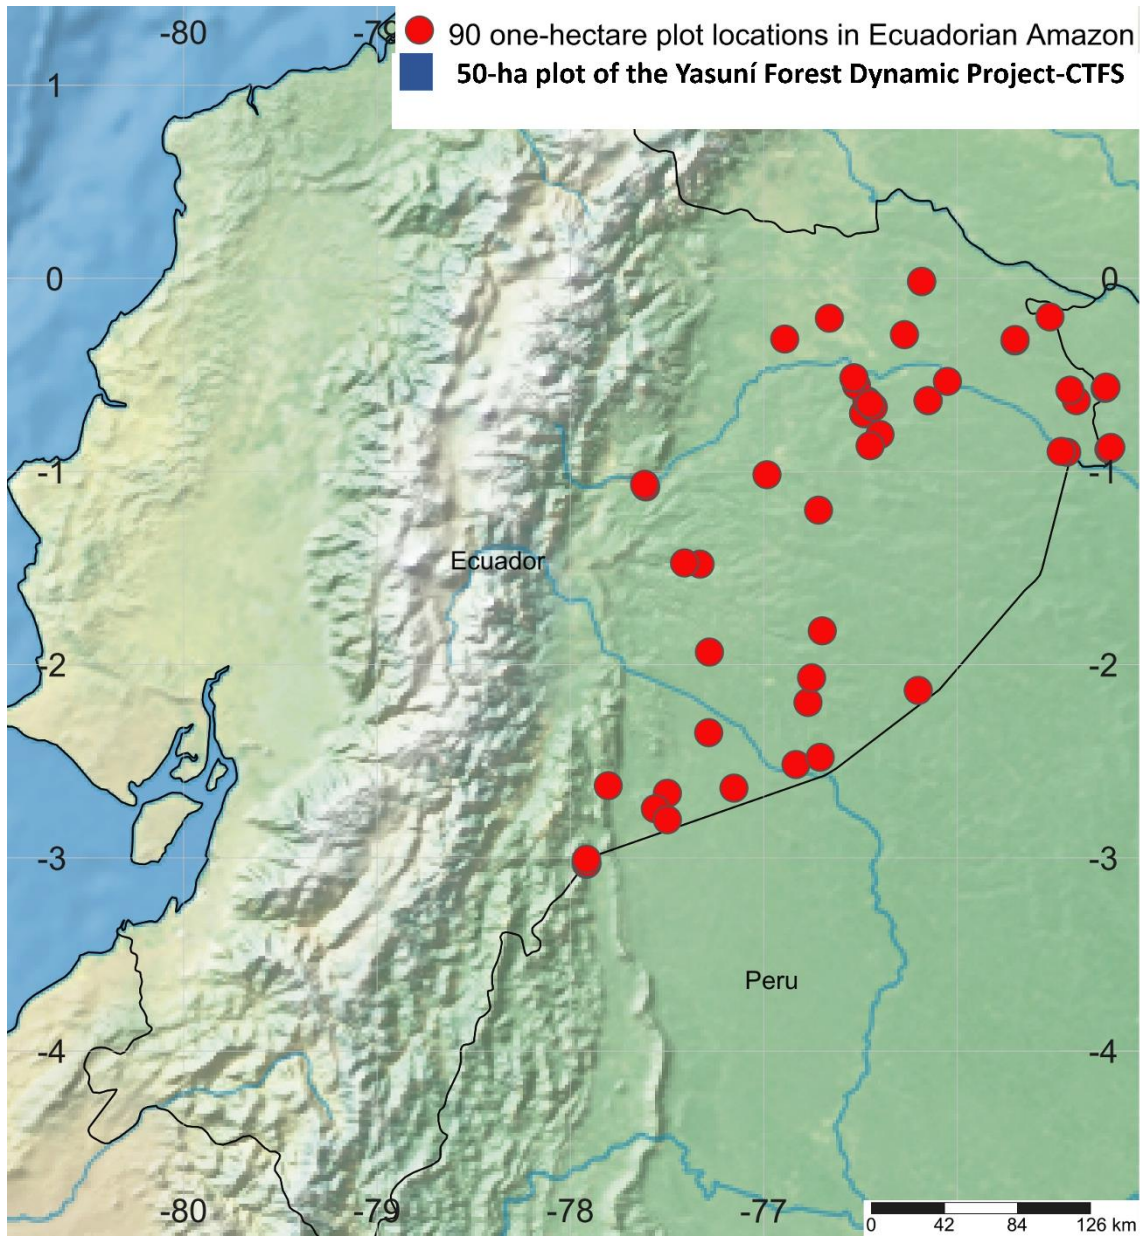

Supplement: Figure_S1.pdf [file Figure_S1.pdf]
